# Supplementary material for: Accurate band gaps from exchange potentials designed from a cuspless hydrogen density-based exchange hole model
Source: Royal Society of Chemistry journal article supplement (doi:10.1039/d1cp05425b), 2022-01-01
Supplement: d1cp05425b1.pdf [file d1cp05425b1.pdf]

**supplemental materials:Accurate band gaps from exchange potentials designed from cusplless hydrogen exchange hole model**

Abhilash Patra,<sup>1, a)</sup> Bikash Patra,<sup>1</sup> and Prasanjit Samal<sup>1, b)</sup>

*School of Physical Sciences, National Institute of Science Education and Research, HBNI, Bhubaneswar 752050, India*

In this supplemental material, We collect GLLB-SC band gaps that have been used to calculate the mean absolute errors for the comparison purpose. Table S1 presents PBE band gaps of Transition metal dichalcogenides as calculated from WIEN2k code and band gaps of GLLB-SC potentials. Also, we collect the quasiparticle gaps from other literature. We mention that the collected band gaps might be obtained with different lattice parameters than our unit cell. Similarly, the band gaps of wide bandgap solids are presented in Table S2. In Fig. S1, the PBE band structure of two three-dimensional topological insulators  $\text{Bi}_2\text{Se}_3$  and  $\text{Bi}_2\text{Te}_3$  is presented.

TABLE S1. Band Gaps of thransition metal dichalcogenides as obtained from PBE exchange correlation energy functional and GLLB-SC potential. The GW band gaps are collected from available literatures.

| Materials       | Expt. | PBE  | GLLB-SC | GW                |
|-----------------|-------|------|---------|-------------------|
| $\text{ReS}_2$  | 1.37  | 1.21 | 1.80    | 1.57 <sup>1</sup> |
| $\text{ReSe}_2$ | 1.19  | 1.05 | 1.60    | 1.38 <sup>2</sup> |
| $\text{RuS}_2$  | 1.45  | 0.92 | 1.85    |                   |
| $\text{RuSe}_2$ | 0.76  | 0.56 | 1.24    |                   |
| $\text{RuTe}_2$ | 0.49  | 0.19 | 0.60    |                   |
| $\text{HfS}_2$  | 1.96  | 0.93 | 1.99    | 1.96 <sup>3</sup> |
| $\text{HfSe}_2$ | 1.13  | 0.48 | 1.17    | 1.26 <sup>3</sup> |
| $\text{MoS}_2$  | 1.23  | 0.89 | 1.41    | 1.23 <sup>4</sup> |
| $\text{MoSe}_2$ | 1.09  | 0.82 | 1.31    | 1.11 <sup>4</sup> |
| $\text{MoTe}_2$ | 1.03  | 0.74 | 1.17    |                   |
| $\text{WS}_2$   | 1.35  | 0.99 | 1.52    | 1.30 <sup>4</sup> |
| $\text{WSe}_2$  | 1.20  | 0.95 | 1.50    | 1.19 <sup>4</sup> |
| $\text{ZrS}_2$  | 1.68  | 0.80 | 1.87    | 1.80 <sup>3</sup> |
| $\text{ZrSe}_2$ | 1.18  | 0.36 | 1.14    | 1.12 <sup>3</sup> |
| MAE             | —     | 0.44 | 0.22    |                   |

**REFERENCES**

- <sup>1</sup>M. Gehlmann, I. Aguilera, G. Bihlmayer, S. Nemsák, P. Nagler, P. Gospodarič, G. Zamborlini, M. Eschbach, V. Feyer, F. Kronast, E. Młynczak, T. Korn, L. Plucinski, C. Schüller, S. Blügel, and C. M. Schneider, *Nano Letters* **17**, 5187 (2017), pMID: 28759250.
- <sup>2</sup>J. P. Echeverry and I. C. Gerber, *Phys. Rev. B* **97**, 075123 (2018).
- <sup>3</sup>H. Jiang, *The Journal of Chemical Physics* **134**, 204705 (2011), <https://doi.org/10.1063/1.3594205>.
- <sup>4</sup>H. Jiang, *The Journal of Physical Chemistry C* **116**, 7664 (2012), <https://doi.org/10.1021/jp300079d>.
- <sup>5</sup>I. H. Nwigboji, J. I. Ejembi, Y. Malozovsky, B. Khamala, L. Franklin, G. Zhao, C. E. Ekuma, and D. Bagayoko, *Materials Chemistry and Physics* **157**, 80 (2015).

<sup>a)</sup>Electronic mail: abhilashpatra@niser.ac.in

<sup>b)</sup>Electronic mail: psamal@niser.ac.in

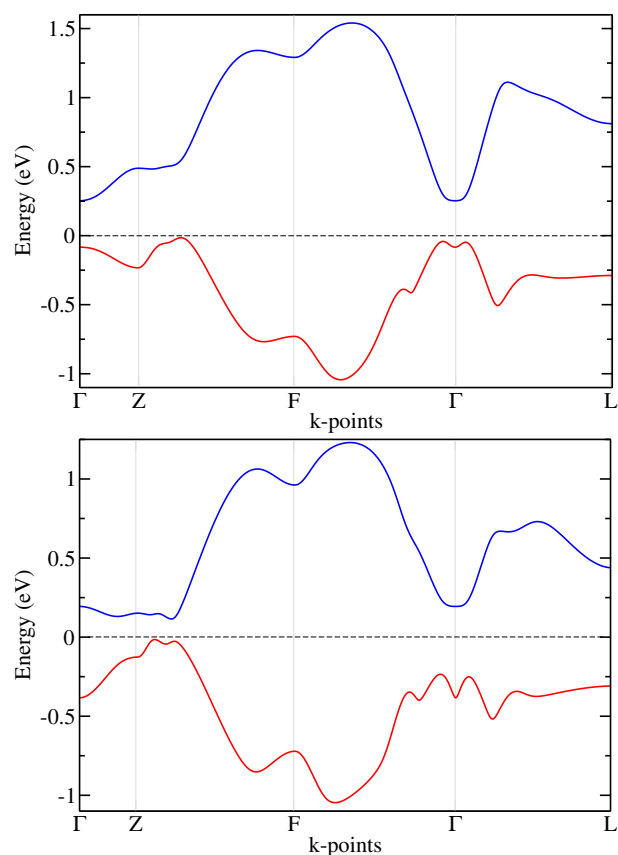

FIG. S1. Band structure of  $\text{Bi}_2\text{Se}_3$  (left) and  $\text{Bi}_2\text{Te}_3$  (right) as obtained by using PBE XC functional. The pronounced ‘m’ like behavior is clear at the  $\Gamma$  point in both the cases.

- <sup>6</sup>M. Kolos and F. Karlicky, *Phys. Chem. Chem. Phys.* **21**, 3999 (2019).
- <sup>7</sup>M. Shishkin, M. Marsman, and G. Kresse, *Phys. Rev. Lett.* **99**, 246403 (2007).
- <sup>8</sup>J. M. Crowley, J. Tahir-Kheli, and W. A. Goddard, *The Journal of Physical Chemistry Letters* **7**, 1198 (2016), pMID: 26944092.
- <sup>9</sup>J.-M. Mewes, P. Jerabek, O. R. Smits, and P. Schwerdtfeger, *Angewandte Chemie (International ed. in English)* **58**, 14260 (2019), 31343819[pmid].

TABLE S2. Band Gaps of twenty seven wide gap solids as obtained from PBE exchange correlation energy functional and GLLB-SC potential.

| Materials         | Expt. | PBE  | GLLB-SC |                         |
|-------------------|-------|------|---------|-------------------------|
| AlN               | 6.11  | 4.14 | 6.52    | 6.28 <sup>5</sup>       |
| BN                | 6.36  | 4.46 | 6.69    | 6.1 <sup>6</sup>        |
| BaO               | 4.80  | 2.07 | 4.7     |                         |
| MgO               | 7.67  | 4.72 | 8.23    | 9.16 <sup>7</sup>       |
| CaO               | 6.88  | 3.75 | 7.33    | 6.61 <sup>a</sup>       |
| BeO               | 10.59 | 7.37 | 10.99   | 11.59 <sup>a</sup>      |
| CaS               | 4.43  | 2.38 | 4.72    |                         |
| BeSe              | 5.5   | 2.63 | 4.26    |                         |
| CaH <sub>2</sub>  | 4.4   | 2.98 | 5.82    |                         |
| PbCl <sub>2</sub> | 4.86  | 3.88 | 6.32    |                         |
| CaCl <sub>2</sub> | 6.9   | 5.56 | 9.87    |                         |
| NaI               | 5.8   | 3.64 | 6.76    | 6.24 <sup>a</sup>       |
| LiH               | 4.94  | 3.68 | 6.49    |                         |
| LiF               | 13.6  | 9.00 | 14.95   | 15.9 <sup>7</sup>       |
| LiCl              | 9.4   | 6.36 | 10.43   | 8.75-10.98 <sup>8</sup> |
| LiBr              | 7.6   | 4.88 | 8.34    |                         |
| KCl               | 8.69  | 5.23 | 9.89    | 8.48 <sup>a</sup>       |
| KBr               | 7.80  | 4.36 | 8.46    |                         |
| NaCl              | 8.75  | 5.08 | 9.48    | 8.75 <sup>a</sup>       |
| NaBr              | 7.1   | 4.12 | 7.86    |                         |
| RbF               | 10.4  | 5.78 | 11.37   |                         |
| RbCl              | 8.3   | 5.07 | 9.76    |                         |
| RbBr              | 7.2   | 4.35 | 8.47    |                         |
| SiO <sub>2</sub>  | 8.9   | 6.01 | 9.98    | 8.77 <sup>a</sup>       |
| Ar                | 14.15 | 8.68 | 15.00   | 14.9 <sup>7</sup>       |
| Kr                | 11.59 | 7.26 | 12.39   | 11.64 <sup>9</sup>      |
| Xe                | 9.29  | 6.22 | 10.25   | 9.29 <sup>9</sup>       |
| MAE               | —     | 2.90 | 0.96    | —                       |

a-G<sub>0</sub>W<sub>0</sub> gaps from Ref.<sup>10</sup>,

<sup>10</sup>A. Morales-García, R. Valero, and F. Illas, The Journal of Physical Chemistry C **121**, 18862 (2017).
